# Supplementary material for: Measuring deterioration of small-area housing environment: Construction of a multi-dimensional assessment index and validation in shared refugee accommodation
Source: PubMed Central journal article supplement — SSM Popul Health. 2020 Dec 31;13:100725. doi: 10.1016/j.ssmph.2020.100725 (PMC7788238; doi:10.1016/j.ssmph.2020.100725), 2020-12-31

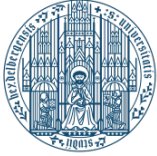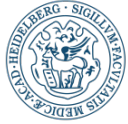

UNIVERSITÄTS  
KLINIKUM  
HEIDELBERG

# Validierungsstudie

Assessment of Small-Area Housing  
Environment Deterioration (SHED)

-

Portfolio 7

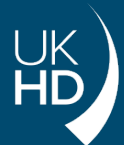

# Notes

- We assume a processing time of about 2min per portfolio. However, you will not be given a time limit.
- During a case you are free to switch between slides and change your answers on the questionnaire as often as you like.
- However, once you have completed a portfolio, there is no way to view the slides again or to change your answers on the questionnaire. Your questionnaire is collected after each portfolio.
- If you have any questions, we are at your available at any time.

# Portfolio 7

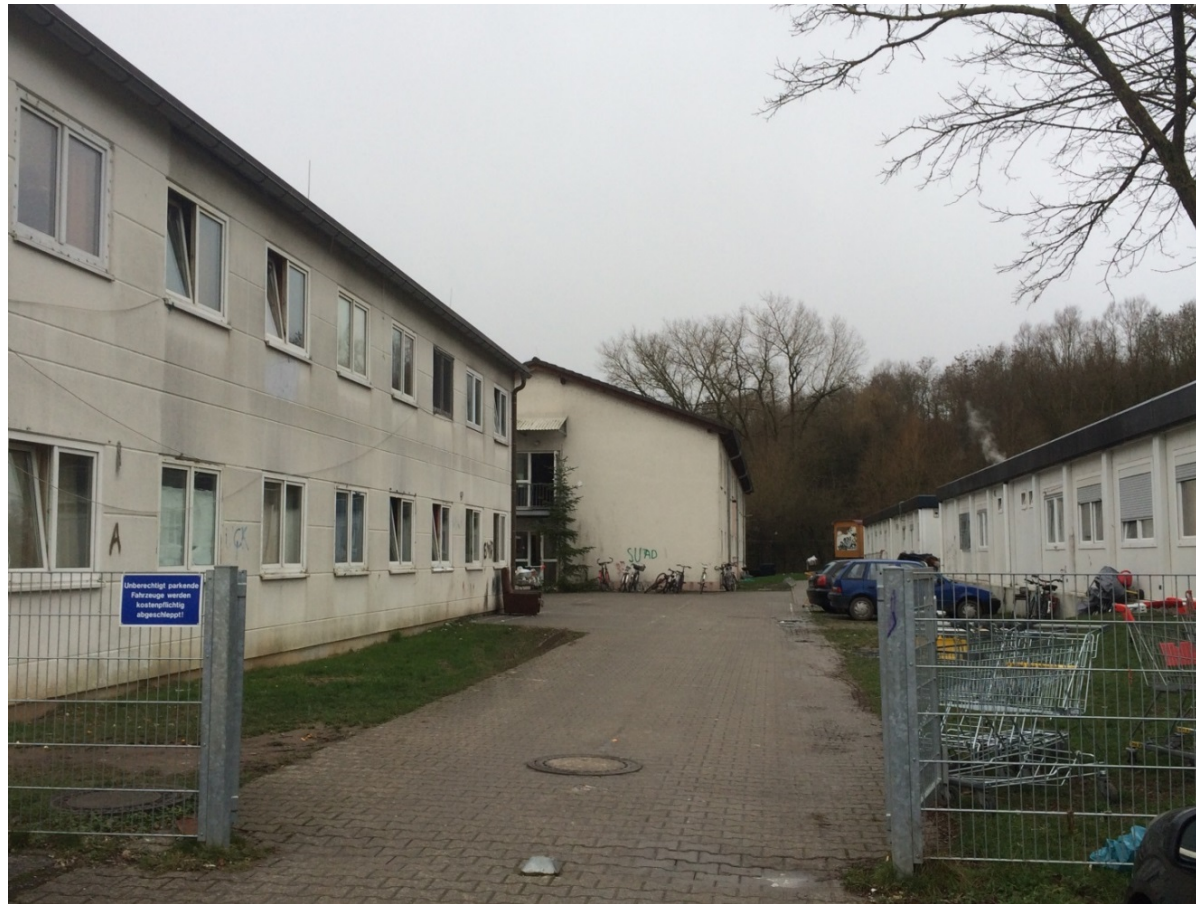

# Portfolio 7

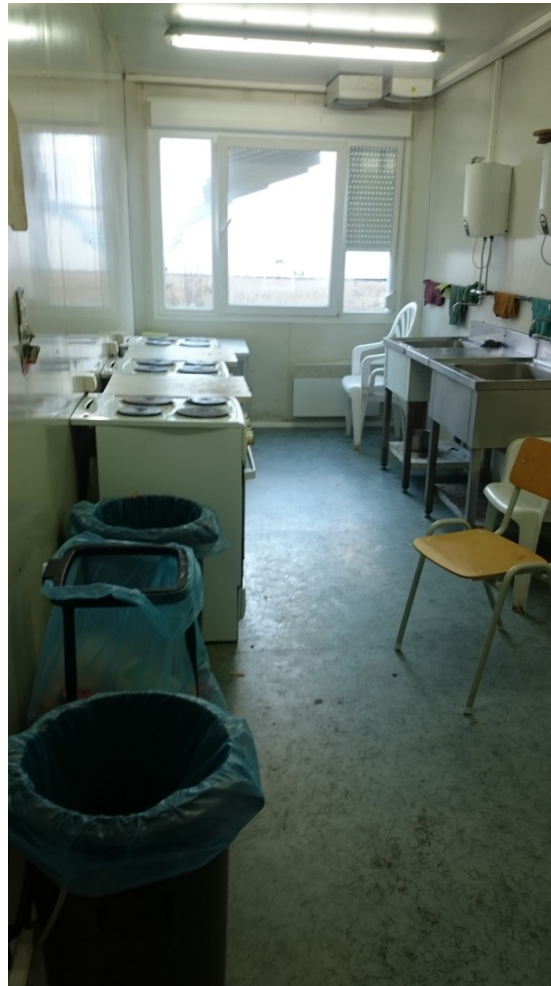

# Portfolio 7

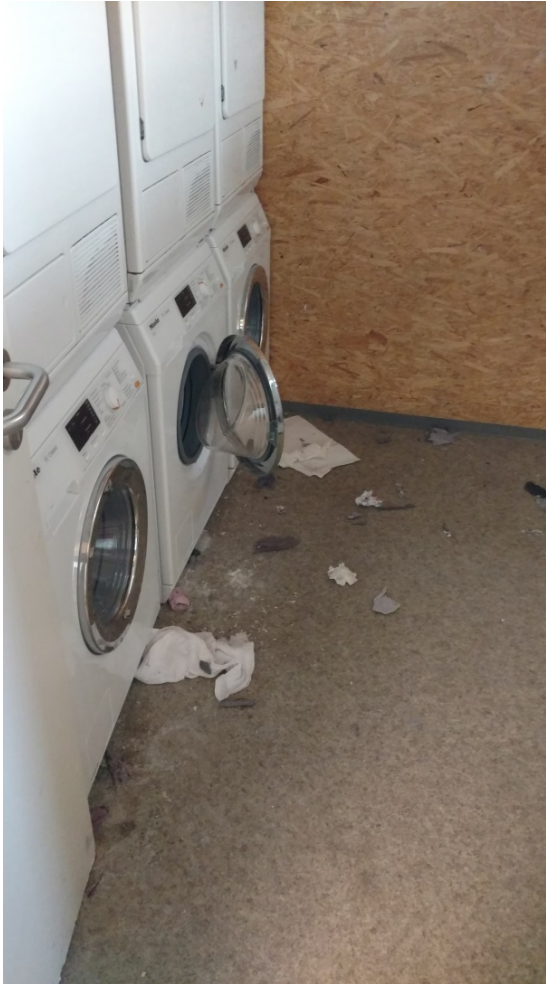

# Portfolio 7

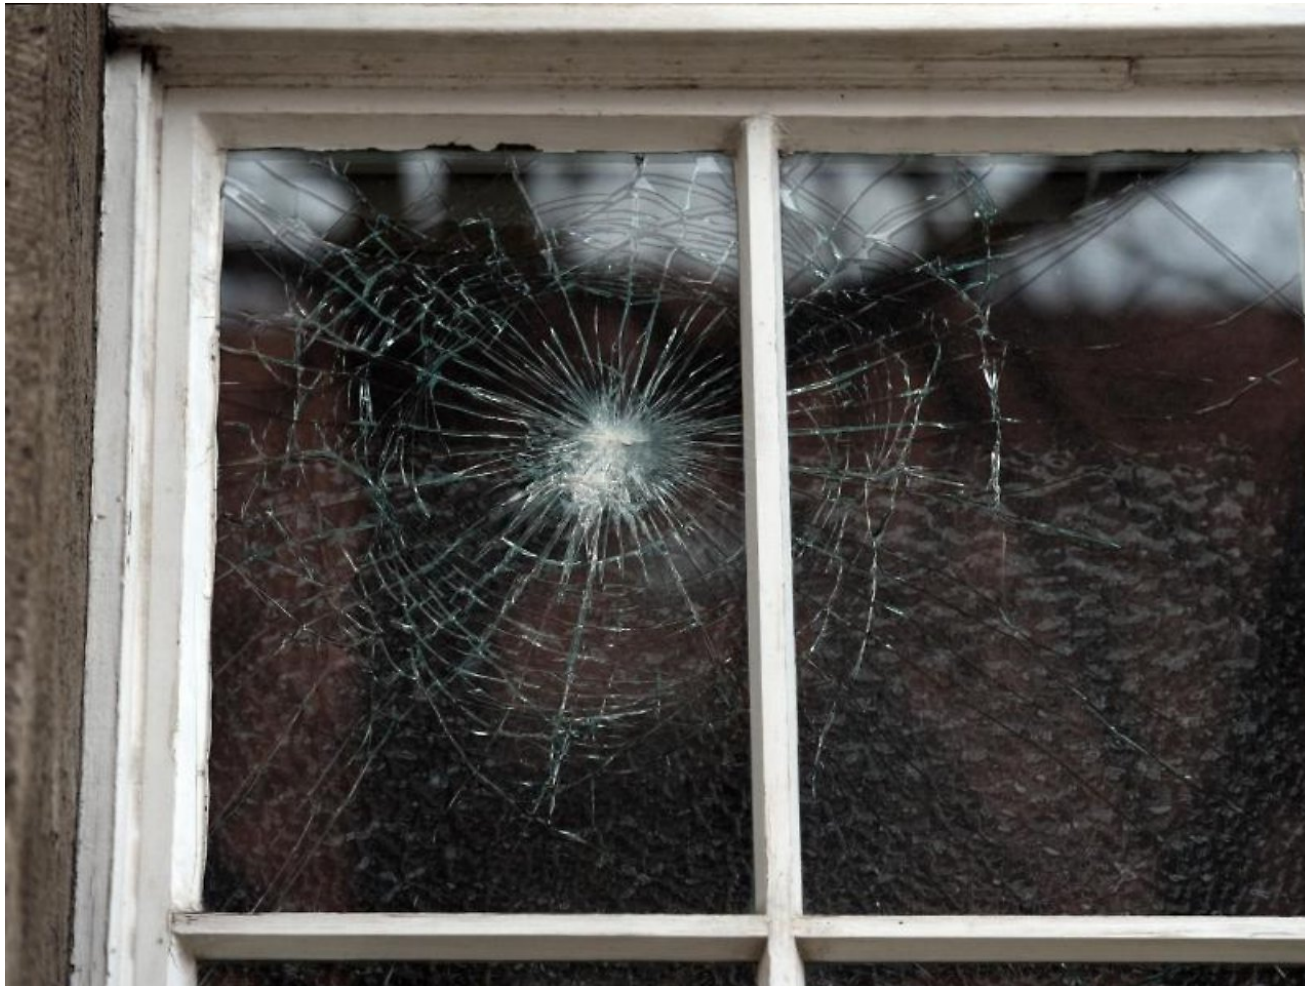

# Portfolio 7

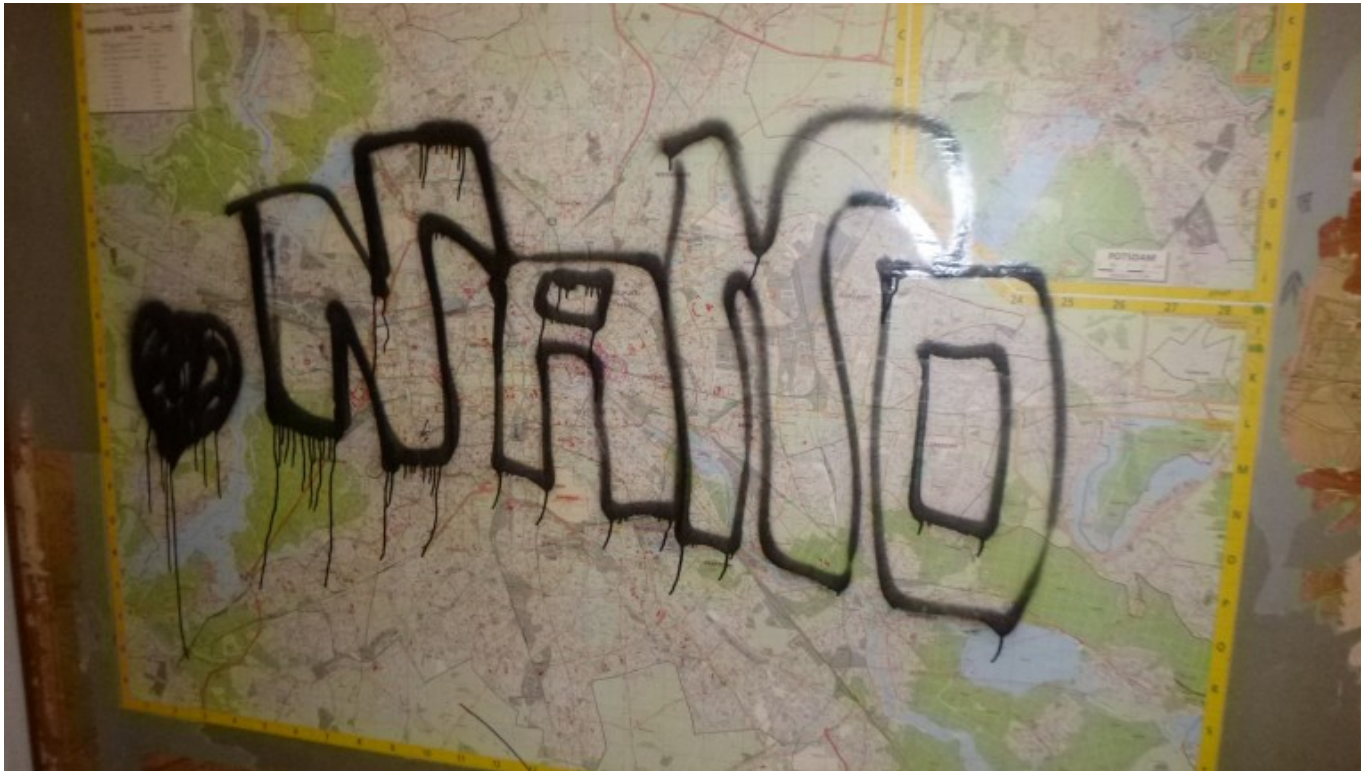



UNIVERSITÄTS  
KLINIKUM  
HEIDELBERG

# Thank you for your time.

Assessment of Small-Area Housing  
Environment Deterioration (SHED)

-

Portfolio 7

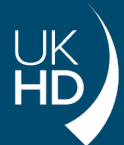

Supplement: mmc5.pdf [file mmc5.pdf]
