# Supplementary figures and images for: Measuring deterioration of small-area housing environment: Construction of a multi-dimensional assessment index and validation in shared refugee accommodation
Source: PubMed Central journal article supplement — SSM Popul Health. 2020 Dec 31;13:100725. doi: 10.1016/j.ssmph.2020.100725 (PMC7788238; doi:10.1016/j.ssmph.2020.100725), 2020-12-31

**Figure 1:** Inter-rater reliability calculations for individual items and SHED index

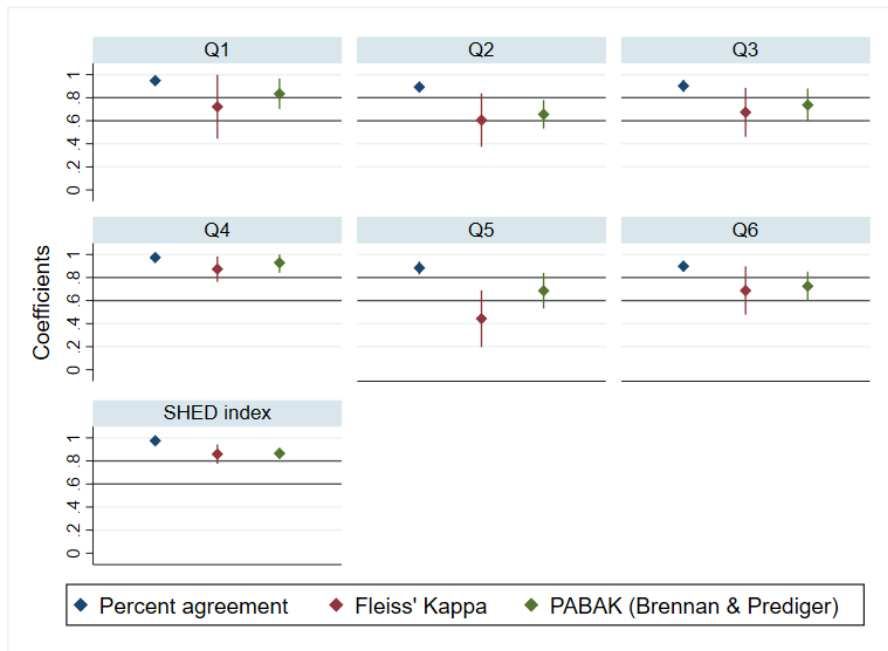

Supplement: mmc2.pdf [file mmc2.pdf]

**Figure 2:** intra-rater reliability calculations for individual items and SHED index

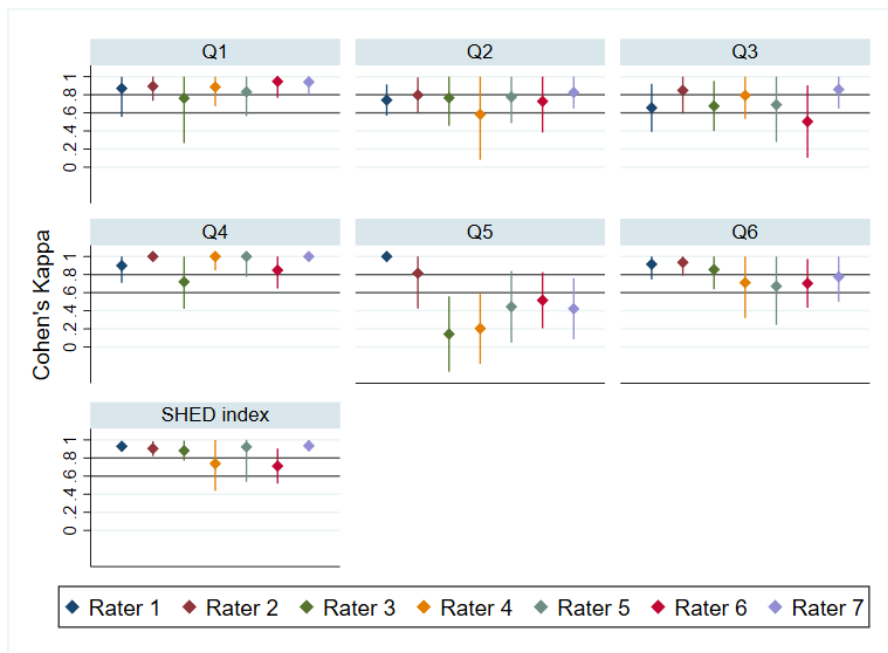

Supplement: mmc3.pdf [file mmc3.pdf]
